# Supplementary material
Source: PubMed Central journal article supplement (PMC4924606)
Supplement: NIHMS68729-supplement-Supplementary_Material.pdf [file NIHMS68729-supplement-Supplementary_Material.pdf]

Figure S2

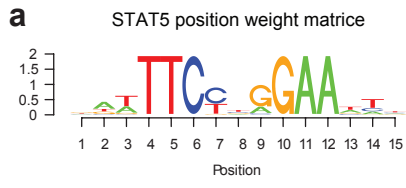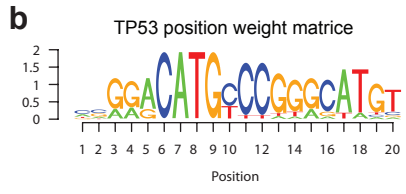

Figure S3

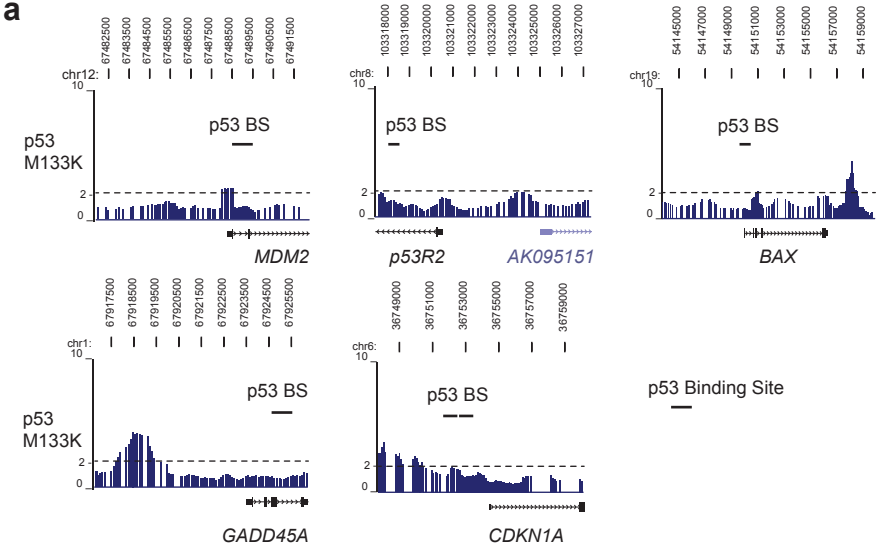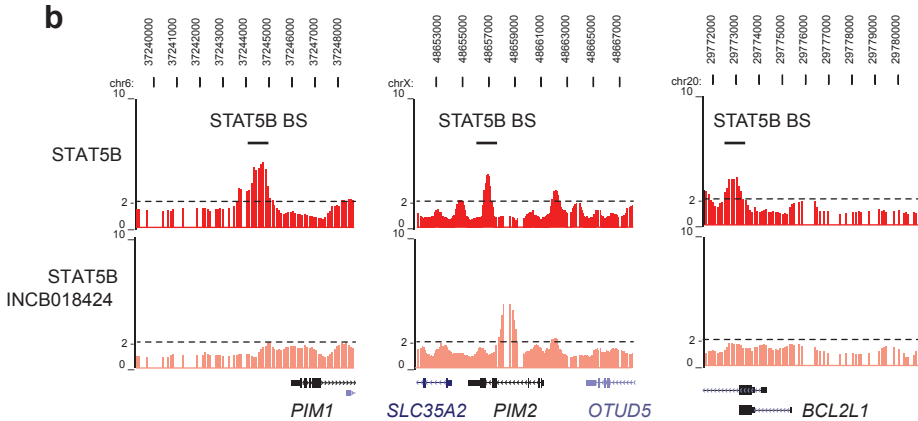

Figure S4

**a**

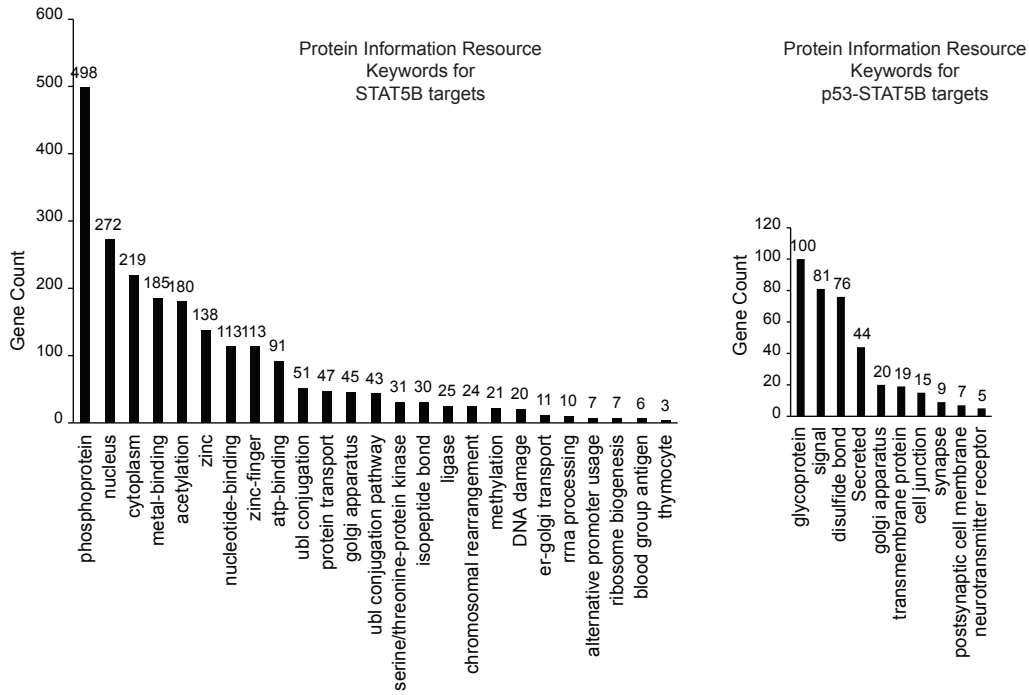

**b**

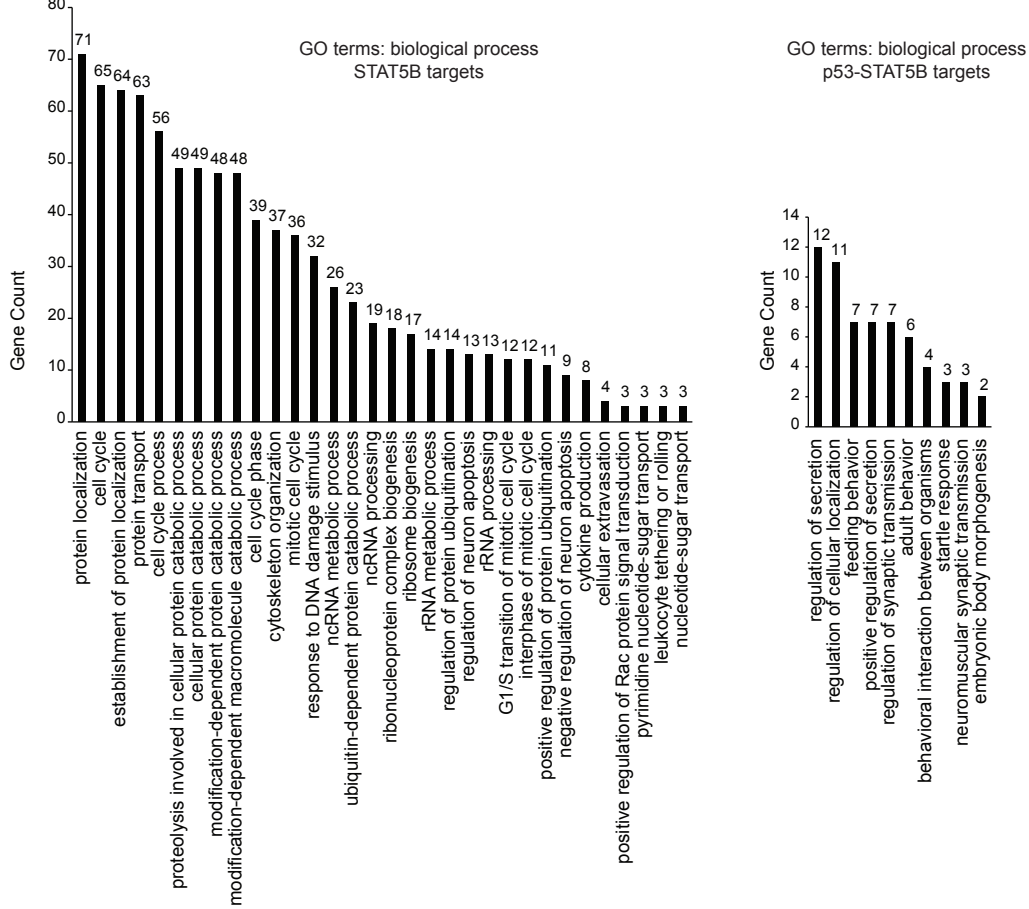

Table S1

| name      | sequence                                      |
|-----------|-----------------------------------------------|
| Del-388s  | gccgcttcctcctacgtcttcttcctctag                |
| Del-388a  | ctagaggaagaagacgtaggaggaagcggc                |
| Del-345s  | aagtctccacatctccctcttcctcctttgcaag            |
| Del-345a  | cttgcaaaggaggaagagggagatgtggagactt            |
| Del-290s  | gtctcctcctcttcctaataatgcaatgccctcag           |
| Del-290a  | ctgagggcattgcattaggaagaggaggagac              |
| Del-186s  | ggcggcttcgcgacgccttcccat                      |
| Del-186a  | atgggaaggcgtcgcgaagccgcc                      |
| Del-176s  | cgcgggcacacgccataccttacatgga                  |
| Del-176a  | tccatgtaaggtatggcgtgtgcccgcg                  |
| Del-169s  | gcacacgccttcccatcatggacaaatgcgtg              |
| Del-169a  | cacgcatttgtccatgatgggaaggcgtgtgc              |
| Del-121s  | gaattcaggccccagcctccagcgc                     |
| Del-121a  | gcgctggaggctgggggcctgaattc                    |
| Del-77s   | cgggagaccaagggggtggggacg                      |
| Del-77a   | cgtccccacccccttggctctccc                      |
| Del-57s   | ggtggggacggtgggaggggaaagg                     |
| Del-57a   | cctttccccctcccaccgtccccacc                    |
| Del-32s   | gggaaaggcaccagccgctccagc                      |
| Del-32a   | gctggagcggctggtgcctttccc                      |
| Del+28s   | ggttcgttcccggcgcgagctttccc                    |
| Del+28a   | gctacttatccagctcgcgcgggaccc                   |
| Del+42s   | gggtcccgcgcgagctggataagtagc                   |
| Del+42a   | gctacttatccagctcgcgcgggaccc                   |
| Del+48s   | gcgcgagctttcccagcttttagcgatcgg                |
| Del+48a   | ccgatcgctaaagctcgggaaagctcgcgc                |
| Del+96s   | gggcgctgcaaggtaactgcacggc                     |
| Del+96a   | gccgtgcagttaccttgcagcggcc                     |
| del+188bs | gtggggcgcggggcctttactatccggggatggggacaatgggag |
| del+188ba | ctcccattgtccccatccccggatagtaaaggccccgcgccccac |
| Del+220s  | ggagggggagtggcacctcctcct                      |
| Del+220a  | aggaggaggtgccactccccctcc                      |

Table S2

| Accession | Start     | End       | Strand | Gene | Gene2         |
|-----------|-----------|-----------|--------|------|---------------|
| chr1      | 11161942  | 11162014  | 633    |      | CHA           |
| chr1      | 11151942  | 11152014  | 777    |      | CHA           |
| chr1      | 14954520  | 14954580  | 577    |      | ZNF687 PK8K   |
| chr1      | 20083028  | 20083054  | 577    |      | PF11828 SVT2  |
| chr1      | 21311240  | 21311252  | 1953   |      | 0.556         |
| chr1      | 22756540  | 22756540  | 2293   |      | EPH4B         |
| chr1      | 24685512  | 24685588  | 578    |      | OR2L1         |
| chr1      | 50226504  | 50227200  | 787    |      | ANKRD4 ELAVL4 |
| chr1      | 50259988  | 50260288  | 691    |      | OR7L1 ELAVL4  |
| chr1      | 55812754  | 55813224  | 473    |      | AK12723       |
| chr1      | 7906141   | 79062308  | 495    |      | CTCF          |
| chr1      | 75151864  | 75151864  | 509    |      | 0.832         |
| chr10     | 8599004   | 8599004   | 944    |      | 0.293         |
| chr11     | 10210623  | 10210725  | 124    |      | 1.175         |
| chr11     | 11621699  | 11622288  | 588    |      | 1.181         |
| chr11     | 11623590  | 11623590  | 495    |      | 1.174         |
| chr11     | 11623980  | 11623980  | 473    |      | 1.181         |
| chr11     | 11725604  | 11725608  | 885    |      | 1.195         |
| chr11     | 11759984  | 11760024  | 1099   |      | 1.145         |
| chr11     | 12303544  | 12303544  | 489    |      | 1.168         |
| chr11     | 12369428  | 12369538  | 881    |      | 1.186         |
| chr11     | 12511970  | 12512036  | 487    |      | 1.236         |
| chr11     | 13069480  | 13069480  | 697    |      | 1.164         |
| chr11     | 13075852  | 13075993  | 1016   |      | 1.287         |
| chr11     | 13075984  | 13075984  | 1016   |      | 1.163         |
| chr11     | 13098348  | 13098348  | 925    |      | 1.164         |
| chr11     | 13093252  | 13093889  | 888    |      | 1.181         |
| chr11     | 13096780  | 13096646  | 787    |      | 1.202         |
| chr11     | 131012024 | 131012024 | 624    |      | 1.195         |
| chr11     | 13172626  | 13172626  | 581    |      | 1.182         |
| chr11     | 1362448   | 1362448   | 1779   |      | 1.199         |
| chr11     | 17594880  | 17594880  | 613    |      | 1.182         |
| chr11     | 4615652   | 4615652   | 791    |      | 1.181         |
| chr11     | 536662    | 536752    | 613    |      | 1.229         |
| chr11     | 6514650   | 6514650   | 985    |      | 1.196         |
| chr11     | 1097054   | 10971058  | 605    |      | 1.167         |
| chr11     | 1534383   | 1534383   | 499    |      | 1.202         |
| chr11     | 789494    | 789494    | 764    |      | 1.182         |
| chr11     | 5133302   | 5133302   | 1104   |      | 1.188         |
| chr11     | 10178158  | 10178158  | 1157   |      | 1.189         |
| chr11     | 10591688  | 10591688  | 1000   |      | 1.182         |
| chr11     | 19781048  | 19781934  | 887    |      | 1.183         |
| chr11     | 5342156   | 5342264   | 687    |      | 1.205         |
| chr11     | 9846454   | 9846454   | 904    |      | 1.183         |
| chr11     | 24743252  | 24743252  | 725    |      | 1.183         |
| chr11     | 4190881   | 41909238  | 1016   |      | 1.183         |
| chr11     | 6072688   | 6072688   | 974    |      | 1.182         |
| chr11     | 7672452   | 76725080  | 489    |      | 1.182         |
| chr11     | 4627246   | 4628204   | 899    |      | 1.181         |
| chr11     | 2956432   | 2956432   | 918    |      | 1.182         |
| chr11     | 3678500   | 3678540   | 1075   |      | 1.182         |
| chr11     | 3680896   | 3681074   | 1075   |      | 1.182         |
| chr11     | 7288204   | 7288204   | 1075   |      | 1.182         |
| chr11     | 2025830   | 2025620   | 791    |      | 1.182         |
| chr11     | 2417996   | 2417652   | 697    |      | 1.182         |
| chr11     | 267880    | 267880    | 888    |      | 1.182         |
| chr11     | 5515820   | 5515820   | 1000   |      | 1.182         |
| chr11     | 5997023   | 5997396   | 184    |      | 1.182         |
| chr11     | 4121886   | 4121886   | 944    |      | 1.182         |
| chr11     | 4272742   | 4272820   | 799    |      | 1.182         |
| chr11     | 5610220   | 5610290   | 701    |      | 1.182         |
| chr11     | 5614228   | 5614228   | 716    |      | 1.182         |
| chr11     | 5912018   | 5912132   | 795    |      | 1.182         |
| chr11     | 6171262   | 6172254   | 1016   |      | 1.182         |
| chr11     | 6276367   | 6276367   | 934    |      | 1.182         |
| chr11     | 6995548   | 6995980   | 433    |      | 1.182         |
| chr11     | 1192548   | 11939554  | 1016   |      | 1.182         |
| chr11     | 21957706  | 21957706  | 1016   |      | 1.182         |
| chr11     | 22362105  | 22362105  | 1210   |      | 1.182         |
| chr11     | 23464210  | 23464704  | 495    |      | 1.182         |
| chr11     | 23523307  | 23523307  | 1016   |      | 1.182         |
| chr11     | 23708540  | 23708590  | 944    |      | 1.182         |
| chr11     | 5197566   | 5198384   | 1269   |      | 1.182         |
| chr11     | 5671414   | 5671414   | 1269   |      | 1.182         |
| chr11     | 7565196   | 7565760   | 765    |      | 1.182         |
| chr11     | 79100099  | 79100094  | 596    |      | 1.182         |
| chr11     | 8484478   | 8484478   | 918    |      | 1.182         |
| chr11     | 1488794   | 1488838   | 444    |      | 1.182         |
| chr11     | 2380538   | 2380842   | 475    |      | 1.182         |
| chr11     | 3510661   | 3510661   | 918    |      | 1.182         |
| chr11     | 3395790   | 3395666   | 477    |      | 1.182         |
| chr11     | 3632444   | 3632518   | 775    |      | 1.182         |
| chr11     | 4174582   | 4174582   | 918    |      | 1.182         |
| chr11     | 30463978  | 3046472   | 747    |      | 1.182         |
| chr11     | 3061278   | 3061316   | 579    |      | 1.182         |
| chr11     | 3286796   | 3286646   | 596    |      | 1.182         |
| chr11     | 3339962   | 3340192   | 501    |      | 1.182         |
| chr11     | 3854508   | 3854508   | 491    |      | 1.182         |
| chr11     | 3854070   | 3854070   | 491    |      | 1.182         |
| chr11     | 3974620   | 3974676   | 509    |      | 1.182         |
| chr11     | 2042490   | 2042074   | 507    |      | 1.182         |
| chr11     | 2150318   | 2150318   | 597    |      | 1.182         |
| chr11     | 12423862  | 12423922  | 527    |      | 1.182         |
| chr11     | 12794708  | 12795222  | 515    |      | 1.182         |
| chr11     | 13815626  | 13815626  | 515    |      | 1.182         |
| chr11     | 13931356  | 13931626  | 471    |      | 1.182         |
| chr11     | 16042087  | 16042872  | 786    |      | 1.182         |
| chr11     | 1626288   | 1626288   | 145    |      | 1.182         |
| chr11     | 18784190  | 18784275  | 686    |      | 1.182         |
| chr11     | 3086392   | 3086442   | 687    |      | 1.182         |
| chr11     | 18515270  | 18515270  | 687    |      | 1.182         |
| chr11     | 7141367   | 7141138   | 492    |      | 1.182         |
| chr11     | 10731650  | 10739448  | 687    |      | 1.182         |
| chr11     | 15283602  | 15283602  | 687    |      | 1.182         |
| chr11     | 16278500  | 16278555  | 516    |      | 1.182         |
| chr11     | 16307348  | 16307357  | 516    |      | 1.182         |
| chr11     | 16501294  | 16501294  | 516    |      | 1.182         |
| chr11     | 16993780  | 16993787  | 508    |      | 1.182         |
| chr11     | 5078669   | 5078135   | 495    |      | 1.182         |
| chr11     | 7105748   | 7105748   | 495    |      | 1.182         |
| chr11     | 7107242   | 7107825   | 1084   |      | 1.182         |
| chr11     | 14781212  | 14782298  | 778    |      | 1.182         |
| chr11     | 12797846  | 12797846  | 778    |      | 1.182         |
| chr11     | 14297540  | 14297501  | 392    |      | 1.182         |
| chr11     | 14388034  | 14388659  | 496    |      | 1.182         |
| chr11     | 9502885   | 9502885   | 496    |      | 1.182         |
| chr11     | 12605288  | 12605282  | 795    |      | 1.182         |
| chr11     | 7066379   | 7066228   | 470    |      | 1.182         |
| chr11     | 7074774   | 7074774   | 470    |      | 1.182         |
| chr11     | 10354145  | 10354219  | 805    |      | 1.182         |
| chr11     | 11609820  | 11609876  | 477    |      | 1.182         |
| chr11     | 6200170   | 6200170   | 477    |      | 1.182         |
| chr11     | 6917192   | 6917829   | 1138   |      | 1.182         |
| chr11     | 2880504   | 2881490   | 987    |      | 1.182         |
| chr11     | 2499520   | 2499520   | 987    |      | 1.182         |
| chr11     | 15845104  | 15845274  | 871    |      | 1.182         |
| chr11     | 10687816  | 10688712  | 577    |      | 1.182         |
| chr11     | 15429440  | 15429440  | 577    |      | 1.182         |
| chr11     | 10098155  | 10098234  | 780    |      | 1.182         |
| chr11     | 3481099   | 3481574   | 636    |      | 1.182         |
| chr11     | 21301118  | 21301180  | 1809   |      | 1.182         |
| chr11     | 3242086   | 3242568   | 483    |      | 1.182         |
| chr11     | 11598472  | 11598280  | 589    |      | 1.182         |
| chr11     | 16921941  | 16921941  | 589    |      | 1.182         |
| chr11     | 9524234   | 9524313   | 900    |      | 1.182         |
| chr11     | 4251472   | 4251682   | 180    |      | 1.182         |
| chr11     | 4251472   | 4251472   | 180    |      | 1.182         |
| chr11     | 1591958   | 15919710  | 713    |      | 1.182         |
| chr11     | 14598184  | 14599366  | 1225   |      | 1.182         |
| chr11     | 71103408  | 71103408  | 1225   |      | 1.182         |
| chr11     | 20890578  | 20890744  | 667    |      | 1.182         |
| chr11     | 9292024   | 9292018   | 567    |      | 1.182         |
| chr11     | 14420814  | 14420814  | 567    |      | 1.182         |
| chr11     | 9858818   | 9858814   | 677    |      | 1.182         |
| chr11     | 14858     | 14828     | 70     |      | 1.182         |
| chr11     | 14830748  | 14830748  | 70     |      | 1.182         |
| chr11     | 386692    | 386687    | 56     |      | 1.182         |
| chr11     | 9391386   | 9391429   | 794    |      | 1.182         |
| chr11     | 569862    | 569815    | 495    |      | 1.182         |
| chr11     | 7042882   | 7043788   | 807    |      | 1.182         |
| chr11     | 51152     | 51152     | 807    |      | 1.182         |
| chr1      | 2092      | 2092      | 0.899  |      | 2.785         |
| chr1      | 11511920  | 11511920  | 1.879  |      | 2.785         |
| chr1      | 14954420  | 14954480  | 1.914  |      | 2.162         |
| chr1      | 20083028  | 20083054  | 1.832  |      | 2.503         |
| chr1      | 21311240  | 21311252  | 2.014  |      | 2.162         |
| chr1      | 22756540  | 22756540  | 2.293  |      | 2.329         |
| chr1      | 24685512  | 24685588  | 2.191  |      | 2.124         |
| chr1      | 50226504  | 50227200  | 0.539  |      | 2.293         |
| chr1      | 50259988  | 50260288  | 2.268  |      | 0.847         |
| chr1      | 55812754  | 55813224  | 1.873  |      | 0.509         |
| chr1      | 7906141   | 79062308  | 0.654  |      | 2.102         |
| chr1      | 75151864  | 75151864  | 2.588  |      | 0.878         |
| chr10     | 8599004   | 8599004   | 2.432  |      | 0.123         |
| chr11     | 10210623  | 10210725  | 2.803  |      | 1.154         |
| chr11     | 11621699  | 11622288  | 2.002  |      | 1.194         |
| chr11     | 11623590  | 11623590  | 1.996  |      | 1.196         |
| chr11     | 11623980  | 11623980  | 1.586  |      | 0.245         |
| chr11     | 11725604  | 11725608  | 2.002  |      | 1.125         |
| chr11     | 11759984  | 11760024  | 1.986  |      | 0.091         |
| chr11     | 12303544  | 12303544  | 1.996  |      | 1.032         |
| chr11     | 12369428  | 12369538  | 1.814  |      | 0.428         |
| chr11     | 12511970  | 12512036  | 2.403  |      | 0.083         |
| chr11     | 13069480  | 13069480  | 2.007  |      | 0.207         |
| chr11     | 13075852  | 13075993  | 2.302  |      | -1.42         |
| chr11     | 13075984  | 13075984  | 2.036  |      | 0.206         |
| chr11     | 13098348  | 13098348  | 1.515  |      | 1.169         |
| chr11     | 13093252  | 13093889  | 2.954  |      | 0.098         |
| chr11     | 13096780  | 13096646  | 1.913  |      | 1.173         |
| chr11     | 131012024 | 1310      |        |      |               |

|       |           |           |      |   |                               |       |        |    |       |       |           |           |      |   |                               |       |        |    |       |         |
|-------|-----------|-----------|------|---|-------------------------------|-------|--------|----|-------|-------|-----------|-----------|------|---|-------------------------------|-------|--------|----|-------|---------|
| chr1  | 23295154  | 23295637  | 484  | * | Peak chr1:23295154-23295637   | 1.685 | -1.509 | 6  | 3.194 | chr1  | 23294644  | 23295637  | 994  | * | Peak chr1:23294644-23295637   | 1.45  | -0.005 | 11 | 1.455 | LUPZ1   |
| chr21 | 32683762  | 32683933  | 621  | * | Peak chr21:32683762-32683933  | 1.619 | -1.61  | 7  | 1.671 | chr21 | 3268762   | 3268468   | 727  | * | Peak chr21:3268762-3268468    | 1.864 | -0.866 | 8  | 2.85  | URE1    |
| chr1  | 44200450  | 44200560  | 601  | * | Peak chr1:44200450-44200560   | 1.477 | 0.336  | 7  | 1.141 | chr1  | 44200230  | 44200926  | 697  | * | Peak chr1:44200230-44200926   | 2.309 | 0.828  | 8  | 1.927 | PHG2    |
| chr1  | 158270926 | 158272102 | 1177 | * | Peak chr1:158270926-158272102 | 2.666 | 0.46   | 14 | 2.2   | chr1  | 158270926 | 158271806 | 881  | * | Peak chr1:158270926-158271806 | 1.95  | -0.541 | 11 | 2.491 | IP013   |
| chr1  | 14653222  | 14654024  | 803  | * | Peak chr1:14653222-14654024   | 1.958 | -1.13  | 8  | 2.088 | chr10 | 14653222  | 14653916  | 695  | * | Peak chr10:14653222-14653916  | 1.682 | -0.556 | 7  | 2.338 | FAM076  |
| chr10 | 14856758  | 14857338  | 581  | * | Peak chr10:14856758-14857338  | 2.211 | 0.884  | 7  | 1.327 | chr10 | 14856568  | 14857258  | 691  | * | Peak chr10:14856568-14857258  | 2.207 | 0.634  | 7  | 2.841 | FAM076  |
| chr11 | 75199382  | 75199850  | 469  | * | Peak chr11:75199382-75199850  | 1.775 | 0.164  | 6  | 1.611 | chr11 | 75199382  | 75200068  | 1277 | * | Peak chr11:75199382-75200068  | 2.123 | -0.816 | 14 | 1.307 | UVAG    |
| chr1  | 14970114  | 14970167  | 574  | * | Peak chr1:14970114-14970167   | 2.176 | -0.187 | 7  | 2.363 | chr1  | 14970114  | 14970168  | 795  | * | Peak chr1:14970114-14970168   | 2.077 | 0.224  | 9  | 1.853 | PGS2    |
| chr21 | 33650570  | 33651472  | 903  | * | Peak chr21:33650570-33651472  | 1.479 | -0.285 | 10 | 1.764 | chr21 | 33650570  | 33651164  | 595  | * | Peak chr21:33650570-33651164  | 1.522 | -0.348 | 7  | 1.87  | IFNAR1  |
| chr1  | 76106708  | 76107226  | 519  | * | Peak chr1:76106708-76107226   | 1.663 | -1.67  | 7  | 3.333 | chr15 | 76106812  | 76107226  | 415  | * | Peak chr15:76106812-76107226  | 2.306 | 1.239  | 6  | 1.067 | TBC1D28 |
| chr2  | 21362734  | 21363746  | 1013 | * | Peak chr2:21362734-21363746   | 1.696 | 0.61   | 11 | 1.115 | chr2  | 21362734  | 21363736  | 913  | * | Peak chr2:21362734-21363736   | 1.614 | 1.3    | 10 | 2.845 | SPR3    |
| chr15 | 8372026   | 83720810  | 585  | * | Peak chr15:8372026-83720810   | 1.339 | -0.688 | 7  | 2.027 | chr15 | 83719602  | 83720810  | 1209 | * | Peak chr15:83719602-83720810  | 1.916 | 0.54   | 13 | 1.062 | AKAP13  |
| chr7  | 155226473 | 155227086 | 614  | * | Peak chr7:155226473-155227086 | 1.513 | -0.199 | 7  | 1.712 | chr7  | 155226473 | 155227086 | 614  | * | Peak chr7:155226473-155227086 | 1.379 | -0.158 | 7  | 1.537 | RRM33   |
| chr9  | 8696348   | 8696950   | 603  | * | Peak chr9:8696348-8696950     | 2.053 | 0.208  | 7  | 2.691 | chr9  | 8696348   | 8696950   | 603  | * | Peak chr9:8696348-8696950     | 1.815 | 0.08   | 7  | 1.35  | PARP6   |
| chr9  | 9009864   | 9011064   | 1201 | * | Peak chr9:9009864-9011064     | 1.524 | -1.287 | 13 | 2.811 | chr9  | 9010292   | 9010866   | 575  | * | Peak chr9:9010292-9010866     | 1.755 | 0.02   | 7  | 1.735 | PTFRD   |
| chr5  | 56234436  | 5623736   | 1301 | * | Peak chr5:56234436-5623736    | 2.093 | 0.087  | 14 | 2.006 | chr5  | 56234436  | 56235146  | 710  | * | Peak chr5:56234436-56235146   | 1.971 | 0.124  | 7  | 1.847 | MER3    |
| chr15 | 70353160  | 70353586  | 427  | * | Peak chr15:70353160-70353586  | 2.761 | -0.356 | 6  | 3.117 | chr15 | 70353160  | 70353586  | 427  | * | Peak chr15:70353160-70353586  | 2.68  | 0.176  | 6  | 2.504 | PARP6   |
| chr21 | 34021002  | 34021870  | 869  | * | Peak chr21:34021002-34021870  | 1.818 | -0.314 | 10 | 2.132 | chr21 | 34021786  | 34022076  | 801  | * | Peak chr21:34021786-34022076  | 2.623 | -0.167 | 9  | 2.79  | IFN1    |
| chr21 | 34033884  | 34034594  | 711  | * | Peak chr21:34033884-34034594  | 1.582 | -0.019 | 8  | 1.611 | chr21 | 34033884  | 34034869  | 976  | * | Peak chr21:34033884-34034869  | 1.964 | -0.262 | 11 | 1.702 | IFN1    |
| chr21 | 34111094  | 34112164  | 1071 | * | Peak chr21:34111094-34112164  | 1.958 | 0.22   | 13 | 1.372 | chr21 | 34110950  | 34111570  | 581  | * | Peak chr21:34110950-34111570  | 1.839 | -0.039 | 7  | 2.509 | IFN1    |
| chr21 | 34111094  | 34112164  | 1071 | * | Peak chr21:34111094-34112164  | 1.97  | 0.598  | 12 | 1.378 | chr21 | 34111788  | 34112914  | 1504 | * | Peak chr21:34111788-34112914  | 1.829 | -0.145 | 16 | 1.974 | IFN1    |
| chr21 | 34112384  | 34113184  | 791  | * | Peak chr21:34112384-34113184  | 2.301 | -1.427 | 9  | 1.372 | chr21 | 34111788  | 34113291  | 1504 | * | Peak chr21:34111788-34113291  | 1.829 | -0.145 | 16 | 1.974 | IFN1    |
| chr21 | 34152886  | 34153972  | 687  | * | Peak chr21:34152886-34153972  | 2.150 | 0.78   | 8  | 1.378 | chr21 | 34152886  | 34155868  | 583  | * | Peak chr21:34152886-34155868  | 2.204 | 0.805  | 7  | 1.35  | IFN1    |
| chr15 | 76424682  | 76425273  | 592  | * | Peak chr15:76424682-76425273  | 2.223 | -0.033 | 7  | 2.256 | chr15 | 76424682  | 76425158  | 477  | * | Peak chr15:76424682-76425158  | 2.113 | -0.228 | 6  | 2.341 | CNR1P1  |
| chr15 | 13189879  | 13189974  | 1163 | * | Peak chr15:13189879-13189974  | 2.323 | 0.511  | 13 | 1.812 | chr15 | 13189974  | 13189974  | 566  | * | Peak chr15:13189974-13189974  | 1.423 | -0.065 | 7  | 1.488 | HRF1    |
| chr5  | 41545456  | 41545660  | 705  | * | Peak chr5:41545456-41545660   | 2.221 | 0.041  | 8  | 2.18  | chr5  | 41545756  | 4155660   | 805  | * | Peak chr5:41545756-4155660    | 1.554 | -0.19  | 9  | 1.744 | FSDX4   |
| chr1  | 40717809  | 40718335  | 527  | * | Peak chr1:40717809-40718335   | 1.764 | 0.369  | 11 | 1.895 | chr1  | 40717732  | 40718222  | 491  | * | Peak chr1:40717732-40718222   | 2.114 | 0.184  | 6  | 1.92  | ZNF642  |
| chr15 | 29073822  | 29074844  | 1173 | * | Peak chr15:29073822-29074844  | 2.1   | 0.74   | 13 | 1.36  | chr15 | 29073822  | 29074844  | 909  | * | Peak chr15:29073822-29074844  | 1.724 | 0.117  | 10 | 1.607 | MTR10   |
| chr2  | 73295556  | 73296335  | 779  | * | Peak chr2:73295556-73296335   | 2.016 | -1.467 | 24 | 2.446 | chr2  | 73295560  | 73296454  | 895  | * | Peak chr2:73295560-73296454   | 1.983 | -0.092 | 10 | 1.891 | SMYD5   |
| chr21 | 33253766  | 33254476  | 711  | * | Peak chr21:33253766-33254476  | 2.906 | -1.562 | 8  | 3.968 | chr21 | 33253766  | 33254584  | 819  | * | Peak chr21:33253766-33254584  | 1.95  | 0.562  | 9  | 1.388 | OLIG2   |
| chr4  | 38563520  | 38563651  | 524  | * | Peak chr4:38563520-38563651   | 2.1   | 0.118  | 10 | 1.782 | chr4  | 38563528  | 38563620  | 701  | * | Peak chr4:38563528-38563620   | 1.589 | 0.073  | 8  | 1.616 | HRF2    |
| chr2  | 23128428  | 23129328  | 901  | * | Peak chr2:23128428-23129328   | 2.168 | 0.063  | 10 | 1.555 | chr2  | 23128807  | 23129556  | 750  | * | Peak chr2:23128807-23129556   | 1.814 | -0.428 | 10 | 1.386 | TGDI1   |
| chr2  | 86200368  | 86201170  | 805  | * | Peak chr2:86200368-86201170   | 2.991 | 1.082  | 9  | 1.909 | chr2  | 86200368  | 86201170  | 805  | * | Peak chr2:86200368-86201170   | 2.163 | 0.287  | 9  | 1.876 | PTCD3   |
| chr15 | 50327098  | 50327584  | 487  | * | Peak chr15:50327098-50327584  | 1.748 | -0.029 | 6  | 2.677 | chr15 | 50326986  | 50327384  | 399  | * | Peak chr15:50326986-50327384  | 2.074 | 1.047  | 7  | 1.027 | HMDC    |
| chr6  | 12632056  | 12632166  | 691  | * | Peak chr6:12632056-12632166   | 1.839 | 0.558  | 8  | 1.281 | chr6  | 12632180  | 12632266  | 1187 | * | Peak chr6:12632180-12632266   | 1.886 | 0.185  | 13 | 1.401 | HINT3   |
| chr9  | 12295300  | 12295567  | 1668 | * | Peak chr9:12295300-12295567   | 1.856 | -0.189 | 18 | 2.245 | chr9  | 12295484  | 12295567  | 674  | * | Peak chr9:12295484-12295567   | 1.885 | 0.126  | 8  | 1.759 | CFP10   |
| chr1  | 14375672  | 14375710  | 679  | * | Peak chr1:14375672-14375710   | 2.057 | -0.482 | 8  | 2.539 | chr1  | 14375722  | 14375822  | 1497 | * | Peak chr1:14375722-14375822   | 2.338 | 1.148  | 16 | 1.19  | POK4DP  |
| chr9  | 13242808  | 13243811  | 1004 | * | Peak chr9:13242808-13243811   | 1.695 | -0.43  | 11 | 2.125 | chr9  | 13243314  | 13243820  | 607  | * | Peak chr9:13243314-13243820   | 2.121 | -1.397 | 7  | 3.518 | MPDZ    |
| chr16 | 74217108  | 74217694  | 587  | * | Peak chr16:74217108-74217694  | 1.786 | -0.043 | 8  | 1.829 | chr16 | 74217108  | 74217694  | 587  | * | Peak chr16:74217108-74217694  | 1.973 | 0.652  | 8  | 1.321 | ADAT1   |
| chr19 | 41397044  | 41397044  | 491  | * | Peak chr19:41397044-41397044  | 2.299 | 0.423  | 6  | 1.876 | chr19 | 41396554  | 41397044  | 491  | * | Peak chr19:41396554-41397044  | 2.512 | 1.432  | 6  | 1.08  | ZNF565  |
| chrX  | 62927392  | 62928438  | 1047 | * | Peak chrX:62927392-62928438   | 2.135 | -0.712 | 11 | 2.847 | chrX  | 62926684  | 62927581  | 898  | * | Peak chrX:62926684-62927581   | 1.428 | -0.316 | 10 | 1.744 | ARHGFB9 |
| chr17 | 7780780   | 7781278   | 499  | * | Peak chr17:7780780-7781278    | 2.527 | 0.02   | 6  | 2.507 | chr17 | 7780780   | 7781495   | 716  | * | Peak chr17:7780780-7781495    | 2.578 | -0.029 | 8  | 2.607 | CNTROB  |
| chr3  | 114715004 | 114715880 | 677  | * | Peak chr3:114715004-114715880 | 2.836 | 1.118  | 8  | 1.518 | chr3  | 114715004 | 114716174 | 1171 | * | Peak chr3:114715004-114716174 | 1.724 | -0.016 | 13 | 1.784 | CCND2C  |
| chr3  | 15868402  | 15868442  | 991  | * | Peak chr3:15868402-15868442   | 1.801 | 0.834  | 11 | 1.167 | chr3  | 15868834  | 15869122  | 489  | * | Peak chr3:15868834-15869122   | 2.046 | 0.817  | 6  | 1.246 | VPR1    |
| chr1  | 18084322  | 18084706  | 495  | * | Peak chr1:18084322-18084706   | 1.469 | -0.333 | 6  | 1.802 | chr1  | 18082992  | 18084706  | 715  | * | Peak chr1:18082992-18084706   | 1.707 | -0.008 | 9  | 1.715 | RG35    |
| chr2  | 23842789  | 23842915  | 1467 | * | Peak chr2:23842789-23842915   | 1.899 | -0.176 | 16 | 2.275 | chr2  | 23842789  | 23842915  | 767  | * | Peak chr2:23842789-23842915   | 1.864 | -0.106 | 9  | 1.97  | RAMP3   |
| chr6  | 13266994  | 13267490  | 497  | * | Peak chr6:13266994-13267490   | 2.589 | 0.067  | 6  | 2.522 | chr6  | 13266946  | 13267294  | 889  | * | Peak chr6:13266946-13267294   | 2.008 | 0.103  | 10 | 1.905 | MOD3    |
| chr2  | 38945084  | 38945692  | 609  | * | Peak chr2:38945084-38945692   | 1.624 | -0.48  | 7  | 2.104 | chr2  | 38945195  | 38945692  | 498  | * | Peak chr2:38945195-38945692   | 2.254 | -0.239 | 6  | 2.015 | DNKX7   |
| chr1  | 39879040  | 39879731  | 692  | * | Peak chr1:39879040-39879731   | 1.51  | -0.133 | 8  | 1.643 | chr1  | 39879360  | 39879731  | 572  | * | Peak chr1:39879360-39879731   | 1.921 | 0.725  | 7  | 1.196 | PCP2    |
| chr20 | 44287758  | 44288266  | 499  | * | Peak chr20:44287758-44288266  | 1.389 | 0.191  | 6  | 1.198 | chr20 | 44287978  | 44288266  | 689  | * | Peak chr20:44287978-44288266  | 1.747 | 0.957  | 6  | 1.69  | CHN2    |
| chr2  | 17504923  | 17504944  | 1022 | * | Peak chr2:17504923-17504944   | 1.616 | -0.814 | 11 | 2.427 | chr2  | 17504623  | 17504720  | 898  | * | Peak chr2:17504623-17504720   | 1.903 | 0.899  | 10 | 1.004 | GP155   |
| chr6  | 32222469  | 32222888  | 480  | * | Peak chr6:32222469-32222888   | 1.919 | 0.447  | 6  | 1.472 | chr6  | 32222469  | 32222888  | 480  | * | Peak chr6:32222469-32222888   | 2.496 | 1.156  | 6  | 1.34  | PRY1    |
| chr8  | 32144508  | 32145588  | 1081 | * | Peak chr8:32144508-32145588   | 2.022 | 0.046  | 12 | 1.976 | chr8  | 32144778  | 32145004  | 1127 | * | Peak chr8:32144778-32145004   | 1.738 | 0.553  | 12 | 1.185 | CHN2    |
| chr4  | 37133530  | 37134224  | 695  | * | Peak chr4:37133530-37134224   | 1.76  | -0.006 | 8  | 1.766 | chr4  | 37133530  | 37134488  | 819  | * |                               |       |        |    |       |         |

**Table S3**

| Primers      | sense                 | antisense              |
|--------------|-----------------------|------------------------|
| ANAPC4       | tgcattttgagaagcactgg  | tactggcctcctcctcttca   |
| ANKRD35      | gccctcagggatacagagatt | tccatccatacctcctctgg   |
| ANTXR1       | tcatgtgtttcccgtgaatg  | tgaagaaacccatggactc    |
| ARHGEF5      | ctacaagccccgagagaatg  | gcttccttcaggttctgtgc   |
| ATP5J        | ctggaggacctgttgatgct  | tggggtttttcgatgacttc   |
| CCDC53       | gaagccacttcagagcaacc  | ttttctcactttcgccatca   |
| CNTROB       | tgctgaggatctcctgctct  | cgggagggtttttcagtcttg  |
| CRABP1       | aaggctttgaggaggagacc  | ctgccttcactctcggacat   |
| CREB1        | tgttgttcaagctgcctctg  | tttcaagcactgccactctg   |
| FOXP1        | ggcagatctcctatgcaagc  | ccccgatagtcactccatgt   |
| FAM107B      | aaaaaggggtcttgctcctc  | gctgttctcctgagattgc    |
| GIN3         | accaagaggggttgaggact  | gctaccagggctgaagtgtc   |
| GNPAT        | atgtgaatgaacctgccaca  | ctctgcgtccactgtttctca  |
| GTF2A2       | gctcagaggggtcaggaacag | tgcttctcttcaaaagcaatga |
| IRF2         | atgcagaaagcgaaacgact  | ctggtgtaaggcaccggatt   |
| MKKS         | gggaggtggctgtactgaaa  | gggagaatctgcctgaactg   |
| MPDZ         | accagatggccttaggcttca | tgcttttggtccgtttaagg   |
| MTMR10       | gtttgggactggtctctcca  | gcagacggcattcctcttag   |
| NDRG3        | tttgctaaagatggcggact  | tcaggggactcacaggattc   |
| PARP6        | agaagcatgggaacatctgg  | gccccctcagtttggtgtaa   |
| PEA15        | ggacaccaagctaaccgta   | agtgggtagatgggtgggtg   |
| PIGM         | ggaaagaatgggggtggtttt | ctatggctggaaggccacta   |
| PTCD3        | gcaagtgccttcagcttacc  | tgattccagcagctatggtg   |
| SMYD5        | atgcagagacctcctttcca  | cattgggttcatcagcctct   |
| LPP          | gtgcaatgtgtgttccaagc  | tggcataataggctccttgc   |
| ACTB         | cctggcaccagcacaat     | gggccggactcgtcact      |
| GTF2A2_ChIP  | cagtccttaggcctctgctg  | ttgccaagctcgtagaagt    |
| FAM107B_ChIP | aaaaggcgactcatccagag  | ttgccaggaagagagctttg   |
| GIN3_ChIP    | aggggaggagatcaaggaaa  | ggttggtggtgcaagtgcag   |
| ATP5J_ChIP   | ggagtgcctgctgaaggtag  | cctgagggctgaagaaaaca   |
| CRABP1_ChIP  | ggagcaatttgaggctgaga  | ccgatcctactgaacctca    |
| ANKRD35_ChIP | tccgtctcccagtaccaaac  | gacagggcagggatgaaata   |



Table S4

| DIAGNOSIS | Sex           | Age at Dx | Year of Dx | Pt. at Dx | SAMPLE NO. | SAMPLE | CELL TYPE      | MEDIA | NO. ALLOQUOTS | Pit count x106/ml post selection | CD45 count x106/ml post selection | CD45 % | JAK2 status | MPL status | Other | Therapy               | BM aspir/repb                | BM Fibrosis                 | Notes                                                |                  |
|-----------|---------------|-----------|------------|-----------|------------|--------|----------------|-------|---------------|----------------------------------|-----------------------------------|--------|-------------|------------|-------|-----------------------|------------------------------|-----------------------------|------------------------------------------------------|------------------|
| 1         | ET            | M         | 32         | 2003      | 2090       |        |                |       |               |                                  |                                   | NR     | WT          | WT         |       | IFN                   | HC, Abnormal Megs            | None                        |                                                      |                  |
| 2         | ET            | M         | 75         | 2003      | 720        |        |                |       |               |                                  |                                   | NR     | WT          | WT         |       | HU (discont), ASPIRIN | Abnormal Megs                | I                           |                                                      |                  |
| 3         | ET            | M         | 60         | 2006      | 1337       |        |                |       |               |                                  |                                   | NR     | WT          | WT         |       | HU/ASPIRIN            | Incr Meg                     | II                          |                                                      |                  |
| 4         | ET            | M         | 50         | 1997      | 1000       |        |                |       |               |                                  |                                   | NR     | WT          | WT         |       | HU                    | Incr Meg                     | None                        | trans to MDS                                         |                  |
| 5         | ET            | M         | 29         | 1989      | 1100       |        |                |       |               |                                  |                                   | NR     | WT          | WT         |       | HU                    | Incr Meg, Atypia             | III/IV                      | trans to MF, had transplant 2011                     |                  |
| 6         | ET            | M         | 54         | 2000      | 1131       |        |                |       |               |                                  |                                   | NR     | WT          | WT         |       | HU                    | Incr Meg                     | None                        |                                                      |                  |
| 7         | ET            | F         | 67         | 2005      | 767        |        |                |       |               |                                  |                                   | NR     | WT          | WT         |       | UNTREATED             | Incr Meg, clusters, Atypia   | III                         |                                                      |                  |
| 8         | ET            | M         | 40         | 1988      | 698        |        |                |       |               |                                  |                                   | NR     | WT          | WT         |       | HU                    | Incr Meg                     | None                        |                                                      |                  |
| 9         | ET            | F         | 89         | 2003      | 810        |        |                |       |               |                                  |                                   | NR     | WT          | WT         |       | HU                    | HC, Incr Meg                 | NR                          |                                                      |                  |
| 10        | ET            | F         | 64         | 2005      | 1216       |        |                |       |               |                                  |                                   | NR     | WT          | WT         |       | HU                    | not recorded                 | II                          |                                                      |                  |
| 11        | ET            | M         | 47         | 2004      | 1448       |        |                |       |               |                                  |                                   | NR     | WT          | WT         |       | UNTREATED             | consistent with ET           | None                        |                                                      |                  |
| 12        | ET            | M         | 65         | 1996      | 1410       |        |                |       |               |                                  |                                   | NR     | WT          | WT         |       | HU                    | HC, Incr Meg                 | None                        | Also has myeloma                                     |                  |
| 13        | ET            | F         | 75         | 2002      | 1394       |        |                |       |               |                                  |                                   | NR     | WT          | WT         |       | HU/ANAGRELIDE         | Incr Meg                     | None                        |                                                      |                  |
| 14        | ET            | F         | 49         | 1997      | 755        |        |                |       |               |                                  |                                   | NR     | WT          | WT         |       | ANAGRELIDE            | Fe stores found              | NR                          |                                                      |                  |
| 15        | ET            | F         | 61         | 2001      | 812        |        |                |       |               |                                  |                                   | NR     | WT          | WT         |       | HU                    | HC, Incr Meg                 | None                        |                                                      |                  |
| 16        | ET            | M         | 59         | 1998      | 820        |        |                |       |               |                                  |                                   | NR     | WT          | WT         |       | HU                    | Incr Meg                     | None                        | patient probably in trans to MF, awaiting BM results |                  |
| 17        | ET            | M         | 49         | 2006      | 1125       |        |                |       |               |                                  |                                   | NR     | WT          | WT         |       | UNTREATED             | Incr Meg and Gran            | II                          |                                                      |                  |
| 18        | ET            | F         | 58         | 1999      | 1409       |        |                |       |               |                                  |                                   | NR     | WT          | WT         |       | HU                    | Incr Meg                     | NR                          |                                                      |                  |
| 19        | ET            | F         | 97         | 2004      | 2473       |        |                |       |               |                                  |                                   | NR     | WT          | WT         |       | TET2 POS              | HC, Incr Meg, low Fe         | Present                     | patient died 01/2012, not related to ET              |                  |
| 20        | ET            | F         | 76         | 2002      | 902        |        |                |       |               |                                  |                                   | NR     | WT          | WT         |       | HU/ANAGRELIDE         | Normal                       | None                        |                                                      |                  |
| 21        | ET            | F         | 65         | 1999      | 667        |        |                |       |               |                                  |                                   | NR     | WT          | WT         |       | HU                    | Normal                       | None                        |                                                      |                  |
| 22        | ET            | F         | 58         | 2003      | 526        | T00923 | PB PLT (CD45-) | TRI   | 1             | 88                               | 0.04                              | 0.045  | MUT         | WT         |       | HU                    | Mild HC                      | None                        |                                                      |                  |
| 23        | ET            | M         | 39         | 2005      | 714        | T00925 | PB PLT (CD45-) | TRI   | 4             | 328                              | 0.08                              | 0.025  | MUT         | WT         |       | UNTREATED             | Meg clusters                 | II                          |                                                      |                  |
| 24        | ET            | F         | 81         | 2006      | 786        | T00928 | PB PLT (CD45-) | TRI   | 2             | 321                              | 0.04                              | 0.0125 | MUT         | WT         |       | HU                    | Incr Meg, clusters           | II                          |                                                      |                  |
| 25        | ET            | F         | 64         | 2007      | 541        | T00943 | PB PLT (CD45-) | TRI   | 1             | 30                               | 0.01                              | 0.2    | MUT         | ND         |       | HU                    | Incr Meg, large forms        | II                          |                                                      |                  |
| 26        | ET            | M         | 59         | 2006      | 778        | T00955 | PB PLT (CD45-) | TRI   | 1             | 64                               | 0.01                              | 0.015  | WT          | WT         |       | HU                    | Incr Meg, large clusters     | II/III                      | t(12;17)(q24.3;q21)                                  |                  |
| 27        | ET            | M         | 62         | 1997      | 127*       | T00957 | PB PLT (CD45-) | TRI   | 4             | 539                              | 0.02                              | 0.0037 | MUT         | WT         |       | TET2 POS              | ANAGRELIDE                   | HC, Abnormal Megs, clusters | II/III                                               | trans to MF 2011 |
| 28        | ET            | M         | 78         | 2010      | 792        | T00959 | PB PLT (CD45-) | TRI   | 4             | 135                              | 0.05                              | 0.037  | MUT         | ND         |       | HU/ASPIRIN            | HC, Incr Megs                | None                        |                                                      |                  |
| 29        | ET            | F         | 53         | 1995      | 776        | T00986 | PB PLT (CD45-) | TRI   | 2             | 176                              | 0.05                              | 0.028  | WT          | WT         |       | HU                    | HC, Incr Megs                | None                        |                                                      |                  |
| 30        | ET            | M         | 46         | 1997      | 773        | T01001 | PB PLT (CD45-) | TRI   | 2             | 203                              | 0.2                               | 0.098  | MUT         | ND         |       | UNTREATED             | Incr Meg, clusters           | None                        | pts are dropping, may be pre-trans                   |                  |
| 31        | ET            | F         | 64         | 2001      | 1400       | T01014 | PB PLT (CD45-) | TRI   | 3             | 303                              | 0.1                               | 0.033  | MUT         | ND         |       | HU                    | Incr Megs                    | None                        |                                                      |                  |
| 32        | ET            | M         | 83         | 2009      | 856        | T01015 | PB PLT (CD45-) | TRI   | 2             | 209                              | 0                                 | 0      | MUT         | ND         |       | TET2 POS              | HU                           | ND                          | ND                                                   |                  |
| 33        | ET            | M         | 44         | 2000      | 1322       | T01016 | PB PLT (CD45-) | TRI   | 1             | 88                               | 0                                 | 0      | MUT         | WT         |       | HU                    | Fe Def                       | None                        |                                                      |                  |
| 34        | ET (probable) | M         | 69         | 2007      | 825        | T01022 | PB PLT (CD45-) | TRI   | 1             | 87                               | 0.01                              | 0.011  | MUT         | ND         |       | HU                    | Dry Asp, fibrotic trephine   | II                          |                                                      |                  |
| 35        | ET            | M         | 72         | 2008      | 745        | T01023 | PB PLT (CD45-) | TRI   | 4             | 483                              | 0                                 | 0      | WT          | ND         |       | HU/ANAGRELIDE         | HC, Incr Megs, clusters      | II                          |                                                      |                  |
| 36        | ET            | F         | 61         | 2010      | 1054       | T01040 | PB PLT (CD45-) | TRI   | 5             | 649                              | 1.1                               | 0.169  | MUT         | WT         |       | HU/ASPIRIN            | HC, Incr Megs                | ND                          |                                                      |                  |
| 37        | ET            | M         | 65         | 2009      | 826        | T01047 | PB PLT (CD45-) | TRI   | 9             | 63                               | 0.03                              | 0.048  | WT          | WT         |       | HU/ASPIRIN            | HC, Incr Megs, clusters      | II                          |                                                      |                  |
| 38        | ET            | F         | 59         | 2002      | 702        | T01051 | PB PLT (CD45-) | TRI   | 4             | 509                              | 0.03                              | 0.006  | MUT         | WT         |       | HU                    | HC                           | None                        |                                                      |                  |
| 39        | ET            | M         | 75         | 2003      | 681        | T01052 | PB PLT (CD45-) | TRI   | 8             | 154                              | 0.1                               | 0.065  | MUT         | WT         |       | TET2 POS              | HC, Incr Megs, abnormal Megs | None                        |                                                      |                  |
| 40        | ET            | F         | 38         | 1990      | 1354       | T01060 | PB PLT (CD45-) | TRI   | 6             | 111                              | 0.2                               | 0.18   | MUT         | WT         |       | HU                    | HC, Incr Megs                | None                        |                                                      |                  |
| 41        | ET            | F         | 36         | 2002      | 768        | T01063 | PB PLT (CD45-) | TRI   | 5             | 537                              | 0.04                              | 0.007  | MUT         | WT         |       | UNTREATED             | Incr Megs                    | None                        |                                                      |                  |
| 42        | ET            | M         | 54         | 2004      | 842        | T01064 | PB PLT (CD45-) | TRI   | 4             | 462                              | 0.01                              | 0.002  | MUT         | WT         |       | IFN                   | Incr Megs, Clusters          | None                        |                                                      |                  |
| 43        | ET            | F         | 62         | 2005      | 1013       | T01320 | PB PLT (CD45-) | TRI   | 2             | 179                              | 0.48                              | 0.06   | MUT         | ND         |       | HU                    | NR                           | NR                          |                                                      |                  |
| 44        | PV            | M         | 74         |           |            |        |                |       |               |                                  |                                   | MUT    | WT          |            |       |                       |                              |                             |                                                      |                  |
| 45        | PV            | F         | 77         |           |            |        |                |       |               |                                  |                                   | MUT    | WT          |            |       |                       |                              |                             |                                                      |                  |
| 46        | PV            | M         | 78         |           |            |        |                |       |               |                                  |                                   | WT     | WT          |            |       |                       |                              |                             |                                                      |                  |
| 47        | PV            | M         | 44         |           |            |        |                |       |               |                                  |                                   | WT     | WT          |            |       |                       |                              |                             |                                                      |                  |
| 48        | ET            | F         | 78         |           |            |        |                |       |               |                                  |                                   | MUT    | WT          |            |       |                       |                              |                             |                                                      |                  |
| 49        | ET            | F         | 44         |           |            |        |                |       |               |                                  |                                   | MUT    | WT          |            |       |                       |                              |                             |                                                      |                  |
| 50        | ET            | F         | 78         |           |            |        |                |       |               |                                  |                                   | MUT    | WT          |            |       |                       |                              |                             |                                                      |                  |
| 51        | ET            | M         | 44         |           |            |        |                |       |               |                                  |                                   | MUT    | WT          |            |       |                       |                              |                             |                                                      |                  |
| 52        | ET            | M         | 44         |           |            |        |                |       |               |                                  |                                   | MUT    | WT          |            |       |                       |                              |                             |                                                      |                  |
| 53        | ET            | F         | 41         | 1986      |            |        |                |       |               |                                  |                                   | MUT    | WT          |            |       | UNTREATED             |                              |                             |                                                      |                  |
| 54        | ET            | M         | 81         |           |            |        |                |       |               |                                  |                                   | WT     | WT          |            |       |                       |                              |                             |                                                      |                  |
| 55        | ET            | F         | 68         |           |            |        |                |       |               |                                  |                                   | WT     | WT          |            |       |                       |                              |                             |                                                      |                  |
| 56        | ET            | M         | 29         |           |            |        |                |       |               |                                  |                                   | WT     | WT          |            |       |                       |                              |                             |                                                      |                  |
| 57        | ET            | M         | 81         |           |            |        |                |       |               |                                  |                                   | WT     | WT          |            |       |                       |                              |                             |                                                      |                  |
| 58        | ET            |           |            |           |            |        |                |       |               |                                  |                                   | WT     | WT          |            |       |                       |                              |                             |                                                      |                  |
| 59        | ET            |           |            |           |            |        |                |       |               |                                  |                                   | WT     | WT          |            |       | HU                    |                              |                             |                                                      |                  |
| 60        | ET            |           |            |           |            |        |                |       |               |                                  |                                   | WT     | WT          |            |       | HU                    |                              |                             |                                                      |                  |
| 61        | ET            |           |            |           |            |        |                |       |               |                                  |                                   | WT     | WT          |            |       |                       |                              |                             |                                                      |                  |
| 62        | ET            |           |            |           |            |        |                |       |               |                                  |                                   | WT     | WT          |            |       | ASPIRIN               |                              |                             |                                                      |                  |
| 63        | ET            |           |            |           |            |        |                |       |               |                                  |                                   | WT     | WT          |            |       |                       |                              |                             |                                                      |                  |
| 64        | ET            |           |            |           |            |        |                |       |               |                                  |                                   | WT     | WT          |            |       |                       |                              |                             |                                                      |                  |
| 65        | PMF           | F         | 74         |           |            |        |                |       |               |                                  |                                   | MUT    | WT          |            |       |                       |                              |                             |                                                      |                  |
| 66        | PMF           | F         | 79         | 2002      |            |        |                |       |               |                                  |                                   | MUT    | WT          |            |       |                       |                              |                             |                                                      |                  |
| 67        | PMF           | M         | 80         |           |            |        |                |       |               |                                  |                                   | MUT    | WT          |            |       |                       |                              |                             |                                                      |                  |
| 68        | PMF           | M         | 82         |           |            |        |                |       |               |                                  |                                   | MUT    | WT          |            |       |                       |                              |                             |                                                      |                  |
| 69        | PMF           | F         | 83         | 1995      |            |        |                |       |               |                                  |                                   | MUT    | WT          |            |       |                       |                              |                             |                                                      |                  |
| 70        | PMF           | M         | 50         | 2004      |            |        |                |       |               |                                  |                                   | MUT    | WT          |            |       |                       |                              |                             |                                                      |                  |
| 71        | PMF           | F         | 83         |           |            |        |                |       |               |                                  |                                   | MUT    | WT          |            |       |                       |                              |                             |                                                      |                  |
| 72        | PMF           | M         | 64         |           |            |        |                |       |               |                                  |                                   | WT     | WT          |            |       |                       |                              |                             |                                                      |                  |
| 73        | PMF           | M         | 67         |           |            |        |                |       |               |                                  |                                   | WT     | WT          |            |       |                       |                              |                             |                                                      |                  |
| 74        | PMF           | M         | 75         |           |            |        |                |       |               |                                  |                                   | WT     | WT          |            |       |                       |                              |                             |                                                      |                  |
| 75        | PMF           | M         | 70         |           |            |        |                |       |               |                                  |                                   | WT     | WT          |            |       |                       |                              |                             |                                                      |                  |
| 76        | PMF           | M         | 26         |           |            |        |                |       |               |                                  |                                   | WT     | WT          |            |       |                       |                              |                             |                                                      |                  |
| 77        | PV            | M         | 82         |           |            |        |                |       |               |                                  |                                   | MUT    | WT          |            |       |                       |                              |                             |                                                      |                  |
| 78        | PV            | F         | 75         |           |            |        |                |       |               |                                  |                                   | MUT    | WT          |            |       |                       |                              |                             |                                                      |                  |
| 79        | ET            | F         | 78         |           |            |        |                |       |               |                                  |                                   | MUT    | WT          |            |       |                       |                              |                             |                                                      |                  |
| 80        | ET            | F         | 42         |           |            |        |                |       |               |                                  |                                   | WT     | WT          |            |       |                       |                              |                             |                                                      |                  |
| 81        | ET            |           |            |           |            |        |                |       |               |                                  |                                   | WT     | WT          |            |       | UNTREATED             |                              |                             |                                                      |                  |
| 82        | ET            |           |            |           |            |        |                |       |               |                                  |                                   | WT     | WT          |            |       |                       |                              |                             |                                                      |                  |
| 83        | PMF           | M         | 78         | 2006      |            |        |                |       |               |                                  |                                   | WT     | WT          |            |       |                       |                              |                             |                                                      |                  |
| 84        | PMF           | M         | 78         |           |            |        |                |       |               |                                  |                                   | WT     | WT          |            |       |                       |                              |                             |                                                      |                  |
| 85        | PMF           | F         | 83         |           |            |        |                |       |               |                                  |                                   | WT     | WT          |            |       |                       |                              |                             |                                                      |                  |
| 86        | PMF           | F         | 79         |           |            |        |                |       |               |                                  |                                   | WT     | WT          |            |       |                       |                              |                             |                                                      |                  |
| 87        | Ctrl          | M         | 29         |           |            |        |                |       |               |                                  |                                   | WT     | WT          |            |       |                       |                              |                             |                                                      |                  |
| 88        | Ctrl          | F         | 35         |           |            |        |                |       |               |                                  |                                   | WT     | WT          |            |       |                       |                              |                             |                                                      |                  |
| 89        | Ctrl          | F         | 33         |           |            |        |                |       |               |                                  |                                   | WT     | WT          |            |       |                       |                              |                             |                                                      |                  |
| 90        | Ctrl          | F         | 26         |           |            |        |                |       |               |                                  |                                   | WT     | WT          |            |       |                       |                              |                             |                                                      |                  |
| 91        | Ctrl          | M         | 28         |           |            |        |                |       |               |                                  |                                   | WT     | WT          |            |       |                       |                              |                             |                                                      |                  |
| 92        | Ctrl          | F         | 34         |           |            |        |                |       |               |                                  |                                   | WT     | WT          |            |       |                       |                              |                             |                                                      |                  |
| 93        | Ctrl          | F         | 35         |           |            |        |                |       |               |                                  |                                   | WT     | WT          |            |       |                       |                              |                             |                                                      |                  |
| 94        | Ctrl          | M         | 29         |           |            |        |                |       |               |                                  |                                   | WT     | WT          |            |       |                       |                              |                             |                                                      |                  |
| 95        | Ctrl          | M         | 35         |           |            |        |                |       |               |                                  |                                   | WT     | WT          |            |       |                       |                              |                             |                                                      |                  |
| 96        | Ctrl          | M         | 45         |           |            |        |                |       |               |                                  |                                   | WT     | WT          |            |       |                       |                              |                             |                                                      |                  |
| 97        | Ctrl          | M         | 34         |           |            |        |                |       |               |                                  |                                   | WT     | WT          |            |       |                       |                              |                             |                                                      |                  |
